# Supplementary material
Source: Springer Nature journal article supplement (https://www.springermedizin.de/resource/supplementary/13054_2009_8354_MOESM1_ESM.pdf/9731778)
Supplement: MOESM1 [file 9731778]

Adult patients:  $\geq 18$  years of age

96 patients judged to be eligible

16 patients (or their relatives) declined participation

80 patients included

8 patients died or were transferred before they could participate in the trial

72 patients randomised

Enoxaparin 40mg  
n=18

Enoxaparin 50mg  
n=16

Enoxaparin 60mg  
n=20

Enoxaparin 70mg  
n=18
